# Supplementary material
Source: PubMed Central journal article supplement (PMC4656076)
Supplement: NIHMS693845-supplement.pdf [file NIHMS693845-supplement.pdf]

**Appendix**  
**Growth Charts for Muscular Strength Capacity With Quantile Regression**  
**Peterson and Krishnan**

**Appendix Table 1.** Growth Charts Including 7 Quantiles of Normalized Strength in Men and Women From Ages 6-80 Years

| <b>Men</b> |                       |                        |                        |                        |                        |                        |                        |
|------------|-----------------------|------------------------|------------------------|------------------------|------------------------|------------------------|------------------------|
| <b>Age</b> | <b>5th Percentile</b> | <b>10th Percentile</b> | <b>25th Percentile</b> | <b>50th Percentile</b> | <b>75th Percentile</b> | <b>90th Percentile</b> | <b>95th Percentile</b> |
| 6 years    | 0.31                  | 0.33                   | 0.40                   | 0.48                   | 0.56                   | 0.63                   | 0.68                   |
| 8 years    | 0.29                  | 0.32                   | 0.39                   | 0.46                   | 0.54                   | 0.61                   | 0.65                   |
| 10 years   | 0.30                  | 0.34                   | 0.42                   | 0.49                   | 0.57                   | 0.64                   | 0.67                   |
| 12 years   | 0.32                  | 0.37                   | 0.45                   | 0.53                   | 0.60                   | 0.68                   | 0.71                   |
| 14 years   | 0.34                  | 0.39                   | 0.47                   | 0.56                   | 0.63                   | 0.71                   | 0.75                   |
| 16 years   | 0.36                  | 0.41                   | 0.49                   | 0.59                   | 0.66                   | 0.74                   | 0.78                   |
| 18 years   | 0.37                  | 0.42                   | 0.51                   | 0.61                   | 0.68                   | 0.77                   | 0.80                   |
| 20 years   | 0.38                  | 0.43                   | 0.51                   | 0.62                   | 0.70                   | 0.78                   | 0.82                   |
| 25 years   | 0.39                  | 0.44                   | 0.52                   | 0.62                   | 0.71                   | 0.79                   | 0.83                   |
| 30 years   | 0.39                  | 0.43                   | 0.51                   | 0.61                   | 0.70                   | 0.78                   | 0.83                   |
| 35 years   | 0.38                  | 0.42                   | 0.50                   | 0.59                   | 0.68                   | 0.76                   | 0.81                   |
| 40 years   | 0.37                  | 0.41                   | 0.48                   | 0.57                   | 0.66                   | 0.73                   | 0.78                   |
| 45 years   | 0.36                  | 0.40                   | 0.47                   | 0.56                   | 0.63                   | 0.71                   | 0.76                   |
| 50 years   | 0.35                  | 0.39                   | 0.46                   | 0.54                   | 0.61                   | 0.69                   | 0.73                   |
| 55 years   | 0.34                  | 0.38                   | 0.45                   | 0.52                   | 0.60                   | 0.67                   | 0.71                   |
| 60 years   | 0.33                  | 0.37                   | 0.44                   | 0.51                   | 0.58                   | 0.65                   | 0.69                   |
| 65 years   | 0.32                  | 0.36                   | 0.42                   | 0.49                   | 0.57                   | 0.64                   | 0.67                   |
| 70 years   | 0.30                  | 0.34                   | 0.40                   | 0.48                   | 0.55                   | 0.62                   | 0.65                   |
| 75 years   | 0.28                  | 0.31                   | 0.38                   | 0.45                   | 0.53                   | 0.59                   | 0.62                   |
| 80 years   | 0.25                  | 0.28                   | 0.36                   | 0.42                   | 0.48                   | 0.55                   | 0.58                   |

  

| <b>Women</b> |                       |                        |                        |                        |                        |                        |                        |
|--------------|-----------------------|------------------------|------------------------|------------------------|------------------------|------------------------|------------------------|
| <b>Age</b>   | <b>5th Percentile</b> | <b>10th Percentile</b> | <b>25th Percentile</b> | <b>50th Percentile</b> | <b>75th Percentile</b> | <b>90th Percentile</b> | <b>95th Percentile</b> |
| 6 years      | 0.29                  | 0.31                   | 0.38                   | 0.45                   | 0.50                   | 0.54                   | 0.57                   |
| 8 years      | 0.28                  | 0.30                   | 0.38                   | 0.44                   | 0.51                   | 0.58                   | 0.60                   |
| 10 years     | 0.29                  | 0.32                   | 0.38                   | 0.46                   | 0.52                   | 0.59                   | 0.62                   |
| 12 years     | 0.30                  | 0.33                   | 0.39                   | 0.46                   | 0.53                   | 0.59                   | 0.63                   |
| 14 years     | 0.31                  | 0.34                   | 0.40                   | 0.47                   | 0.53                   | 0.59                   | 0.63                   |
| 16 years     | 0.31                  | 0.34                   | 0.40                   | 0.47                   | 0.53                   | 0.59                   | 0.63                   |
| 18 years     | 0.31                  | 0.34                   | 0.40                   | 0.47                   | 0.53                   | 0.59                   | 0.63                   |
| 20 years     | 0.31                  | 0.34                   | 0.40                   | 0.46                   | 0.53                   | 0.59                   | 0.63                   |
| 25 years     | 0.29                  | 0.32                   | 0.38                   | 0.45                   | 0.52                   | 0.58                   | 0.62                   |
| 30 years     | 0.28                  | 0.31                   | 0.37                   | 0.43                   | 0.51                   | 0.58                   | 0.61                   |
| 35 years     | 0.27                  | 0.29                   | 0.36                   | 0.42                   | 0.50                   | 0.57                   | 0.61                   |
| 40 years     | 0.26                  | 0.29                   | 0.35                   | 0.41                   | 0.49                   | 0.56                   | 0.60                   |
| 45 years     | 0.25                  | 0.28                   | 0.34                   | 0.40                   | 0.48                   | 0.55                   | 0.59                   |
| 50 years     | 0.24                  | 0.27                   | 0.33                   | 0.40                   | 0.47                   | 0.53                   | 0.57                   |
| 55 years     | 0.24                  | 0.27                   | 0.32                   | 0.39                   | 0.45                   | 0.51                   | 0.55                   |
| 60 years     | 0.23                  | 0.26                   | 0.31                   | 0.37                   | 0.43                   | 0.49                   | 0.53                   |
| 65 years     | 0.22                  | 0.25                   | 0.30                   | 0.36                   | 0.42                   | 0.47                   | 0.51                   |
| 70 years     | 0.20                  | 0.24                   | 0.28                   | 0.34                   | 0.40                   | 0.45                   | 0.48                   |
| 75 years     | 0.19                  | 0.23                   | 0.27                   | 0.32                   | 0.38                   | 0.44                   | 0.46                   |
| 80 years     | 0.19                  | 0.22                   | 0.26                   | 0.30                   | 0.36                   | 0.43                   | 0.45                   |

**Appendix**  
**Growth Charts for Muscular Strength Capacity With Quantile Regression**  
**Peterson and Krishnan**

**Appendix Table 2.** Growth Charts Including 7 Quantiles of Absolute Strength in Men and Women From Ages 6-80 Years

| <b>Men</b> |                       |                        |                        |                        |                        |                        |                        |
|------------|-----------------------|------------------------|------------------------|------------------------|------------------------|------------------------|------------------------|
| <b>Age</b> | <b>5th Percentile</b> | <b>10th Percentile</b> | <b>25th Percentile</b> | <b>50th Percentile</b> | <b>75th Percentile</b> | <b>90th Percentile</b> | <b>95th Percentile</b> |
| 6 years    | 8.20                  | 8.70                   | 10.30                  | 11.70                  | 13.70                  | 15.10                  | 16.30                  |
| 8 years    | 9.09                  | 10.00                  | 11.55                  | 13.83                  | 16.30                  | 18.22                  | 19.56                  |
| 10 years   | 13.65                 | 15.20                  | 17.40                  | 20.60                  | 24.07                  | 26.63                  | 28.11                  |
| 12 years   | 18.70                 | 20.76                  | 23.77                  | 27.80                  | 32.16                  | 35.44                  | 37.17                  |
| 14 years   | 23.26                 | 25.69                  | 29.48                  | 34.17                  | 39.22                  | 43.20                  | 45.27                  |
| 16 years   | 27.07                 | 29.72                  | 34.18                  | 39.39                  | 44.91                  | 49.53                  | 51.97                  |
| 18 years   | 30.11                 | 32.88                  | 37.89                  | 43.46                  | 49.30                  | 54.45                  | 57.25                  |
| 20 years   | 32.43                 | 35.26                  | 40.70                  | 46.50                  | 52.54                  | 58.09                  | 61.22                  |
| 25 years   | 35.77                 | 38.60                  | 44.65                  | 50.60                  | 56.79                  | 62.85                  | 66.63                  |
| 30 years   | 36.69                 | 39.47                  | 45.63                  | 51.37                  | 57.48                  | 63.52                  | 67.68                  |
| 35 years   | 36.25                 | 39.03                  | 44.99                  | 50.43                  | 56.38                  | 62.13                  | 66.45                  |
| 40 years   | 35.15                 | 37.99                  | 43.59                  | 48.82                  | 54.59                  | 59.99                  | 64.33                  |
| 45 years   | 33.82                 | 36.74                  | 41.92                  | 47.11                  | 52.70                  | 57.86                  | 62.15                  |
| 50 years   | 32.46                 | 35.47                  | 40.28                  | 45.59                  | 51.01                  | 56.09                  | 60.32                  |
| 55 years   | 31.12                 | 34.19                  | 38.72                  | 44.29                  | 49.56                  | 54.70                  | 58.87                  |
| 60 years   | 29.76                 | 32.81                  | 37.22                  | 43.08                  | 48.21                  | 53.51                  | 57.59                  |
| 65 years   | 28.20                 | 31.15                  | 35.60                  | 41.64                  | 46.69                  | 52.08                  | 56.04                  |
| 70 years   | 26.25                 | 29.00                  | 33.67                  | 39.60                  | 44.66                  | 49.89                  | 53.62                  |
| 75 years   | 23.62                 | 26.05                  | 31.14                  | 36.46                  | 41.65                  | 46.25                  | 49.56                  |
| 80 years   | 20.00                 | 22.01                  | 27.70                  | 31.68                  | 37.20                  | 40.40                  | 43.00                  |

  

| <b>Women</b> |                       |                        |                        |                        |                        |                        |                        |
|--------------|-----------------------|------------------------|------------------------|------------------------|------------------------|------------------------|------------------------|
| <b>Age</b>   | <b>5th Percentile</b> | <b>10th Percentile</b> | <b>25th Percentile</b> | <b>50th Percentile</b> | <b>75th Percentile</b> | <b>90th Percentile</b> | <b>95th Percentile</b> |
| 6 years      | 7.60                  | 8.00                   | 8.90                   | 10.60                  | 11.80                  | 13.00                  | 14.30                  |
| 8 years      | 9.98                  | 10.68                  | 11.90                  | 13.58                  | 16.00                  | 18.08                  | 19.40                  |
| 10 years     | 13.44                 | 14.40                  | 16.37                  | 18.60                  | 21.50                  | 24.44                  | 26.20                  |
| 12 years     | 16.50                 | 17.62                  | 20.19                  | 22.92                  | 26.01                  | 29.58                  | 31.79                  |
| 14 years     | 18.88                 | 20.11                  | 23.04                  | 26.13                  | 29.30                  | 33.29                  | 35.87                  |
| 16 years     | 20.63                 | 21.91                  | 25.02                  | 28.33                  | 31.55                  | 35.78                  | 38.61                  |
| 18 years     | 21.86                 | 23.17                  | 26.33                  | 29.76                  | 33.04                  | 37.39                  | 40.38                  |
| 20 years     | 22.67                 | 24.00                  | 27.15                  | 30.62                  | 33.97                  | 38.37                  | 41.43                  |
| 25 years     | 23.53                 | 24.88                  | 27.90                  | 31.34                  | 34.96                  | 39.28                  | 42.25                  |
| 30 years     | 23.49                 | 24.86                  | 27.81                  | 31.21                  | 35.12                  | 39.27                  | 41.98                  |
| 35 years     | 23.11                 | 24.52                  | 27.50                  | 30.91                  | 35.06                  | 39.03                  | 41.47                  |
| 40 years     | 22.63                 | 24.09                  | 27.17                  | 30.66                  | 34.90                  | 38.72                  | 40.96                  |
| 45 years     | 22.11                 | 23.63                  | 26.80                  | 30.40                  | 34.57                  | 38.24                  | 40.40                  |
| 50 years     | 21.55                 | 23.12                  | 26.32                  | 30.01                  | 33.98                  | 37.50                  | 39.69                  |
| 55 years     | 20.88                 | 22.48                  | 25.62                  | 29.36                  | 33.00                  | 36.37                  | 38.68                  |
| 60 years     | 20.00                 | 21.61                  | 24.61                  | 28.34                  | 31.61                  | 34.84                  | 37.32                  |
| 65 years     | 18.80                 | 20.39                  | 23.22                  | 26.86                  | 29.80                  | 32.91                  | 35.55                  |
| 70 years     | 17.19                 | 18.75                  | 21.43                  | 24.94                  | 27.70                  | 30.75                  | 33.46                  |
| 75 years     | 15.06                 | 16.57                  | 19.23                  | 22.57                  | 25.44                  | 28.53                  | 31.13                  |
| 80 years     | 12.33                 | 13.80                  | 16.70                  | 19.89                  | 23.29                  | 26.56                  | 28.81                  |
